# Supplementary material for: Aberrant expression of miR-133a in endothelial cells inhibits angiogenesis by reducing pro-angiogenic but increasing anti-angiogenic gene expression
Source: PubMed Central journal article supplement (PMC9427859; doi:10.1038/s41598-022-19172-x), 2022-08-30
Supplement: 41598_2022_19172_MOESM1_ESM.pdf [file 41598_2022_19172_MOESM1_ESM.pdf]

A

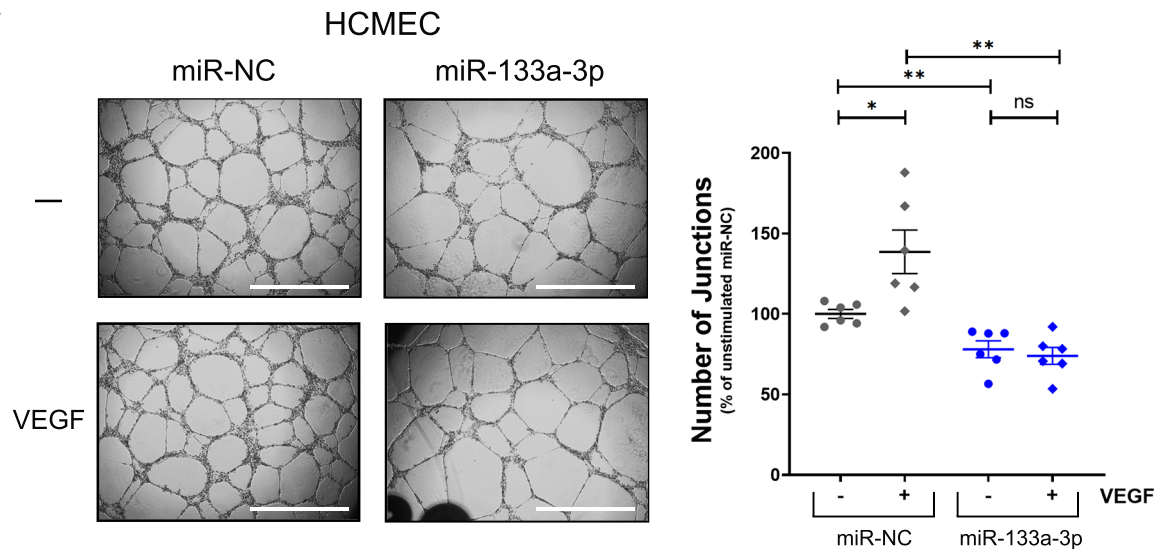

B

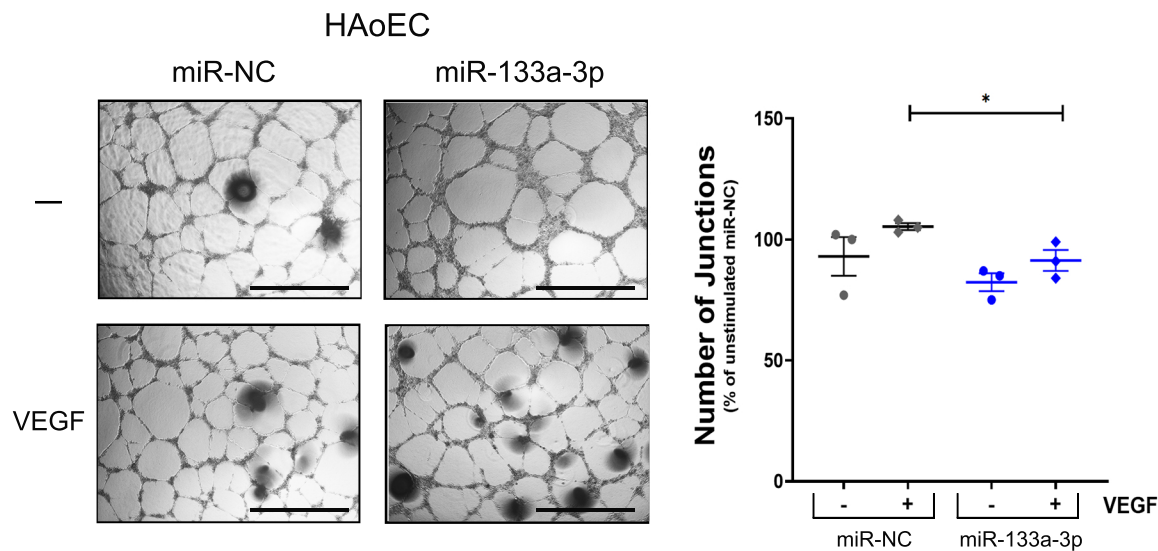

**Figure S1. Ectopic expression of miR-133a-3p in HCMEC or HAoEC inhibits VEGF-induced angiogenesis.** Human Cardiac Microvascular Endothelial Cells (HCMEC) (A) or Human Aortic Endothelial Cells (HAoEC) (B) transfected with miR-133a-3p mimics or a negative control (miR-NC) were seeded on Growth-Factor Reduced Matrigel (Geltrex) in ECGM medium containing 1% FBS and were left untreated (-) or were stimulated with VEGF-A165 at 50 ng/ml (+) as indicated. Images show representative fields from experiments quantified in the histogram. Data are shown as mean  $\pm$  SE,  $n = 6$  (A) or  $n = 3$  (B). ns = non-significant; \*,  $P \leq 0.05$ ; \*\*,  $P \leq 0.01$  (unpaired two-tailed Student's *t*-test when comparing the indicated groups). Scale bars, 1000  $\mu$ m. Image J for windows bundled with 64-bit Java 1.8.0\_172 was used in this figure (<https://imagej.nih.gov/ij/>).

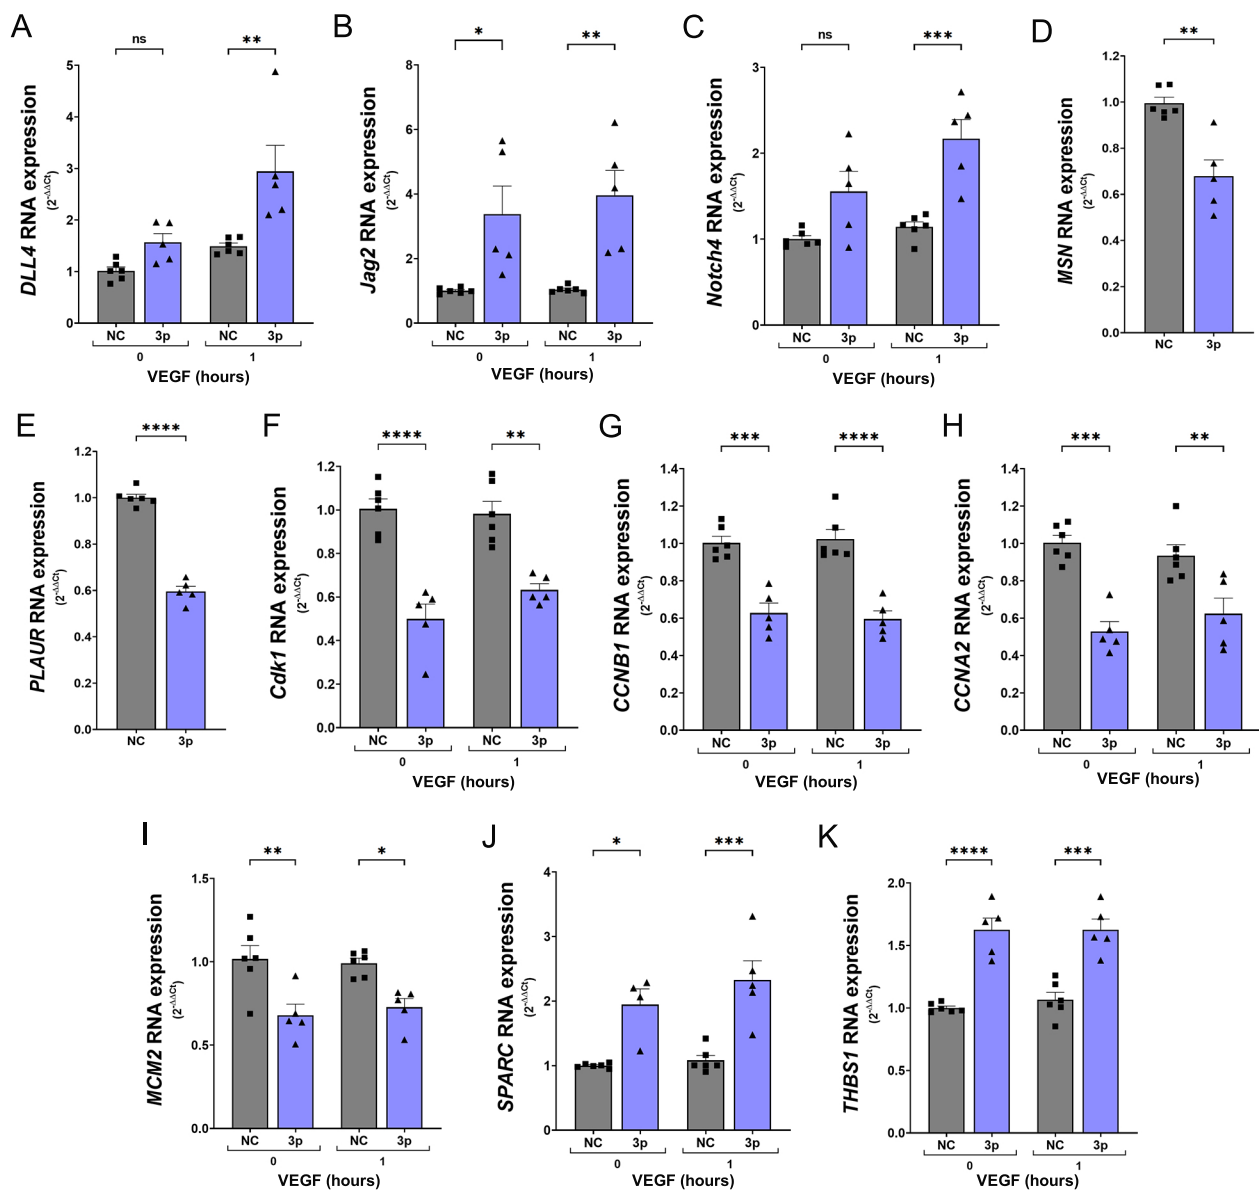

**Figure S2. Aberrant expression of miR-133a-3p in primary Human Aortic Endothelial Cells (HAoEC) significantly alters the expression of genes encoding components of Notch signalling, cell migration, cell cycle regulators, and extracellular matrix.** HAoEC were transfected with a control miR mimic (NC, grey bars) or a mimic for human miR-133a-3p (3p, blue bars) and RNA levels for the indicated genes were determined by qPCR. Expression of genes encoding Notch-signalling components (A-C), motility proteins (D, E), cell-cycle regulators (F-I) or extracellular matrix proteins (J-K) were significantly altered in cells expressing miR-133a-3p. Data are shown as mean  $\pm$  SE,  $n = 5-6$ . Data were analysed for statistical differences by two-way ANOVA with *post hoc* Tukey's comparison test. ns = non-significant; \*,  $P \leq 0.05$ ; \*\*,  $P \leq 0.01$ ; \*\*\*,  $P \leq 0.001$ ; \*\*\*\*,  $P \leq 0.0001$ . VEGF = VEGF-A165.

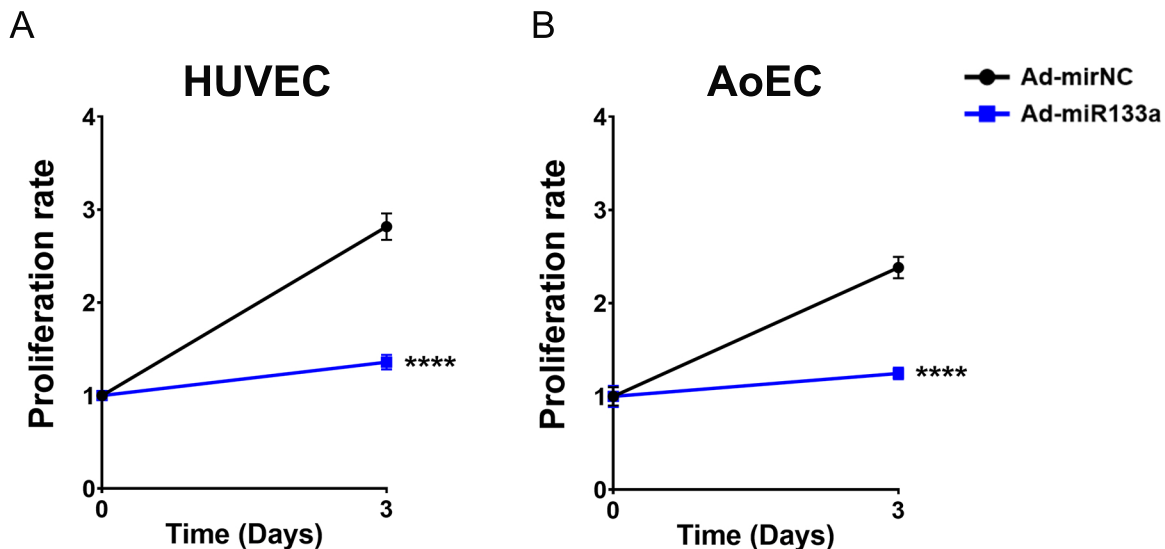

**Figure S3. Ectopic expression of miR-133a in HUVEC or AoEC significantly inhibits endothelial cell proliferation.** HUVEC (A) or HAoEC (B) infected with adenovirus negative control (AdmiR-NC, black line) or with an adenovirus expressing miR-133a (AdmiR-133a, blue line) were cultured in ECGM containing VEGF-A165 (50 ng/ml) for the indicated times. Number of cells were determined at the indicated time by detachment with trypsin and cell counting using a hemacytometer. Proliferation rate was calculated as number of cells after 3 days of culture divided by number of cells at 0 days. Data are shown as mean  $\pm$  SE, n = 5. \*\*\*\*,  $P \leq 0.0001$  AdmiR-133a vs AdmiR-NC at 3 Days analysed by two-way ANOVA with *post hoc* Bonferroni's comparison test.

A

## HUVEC hydroxyurea

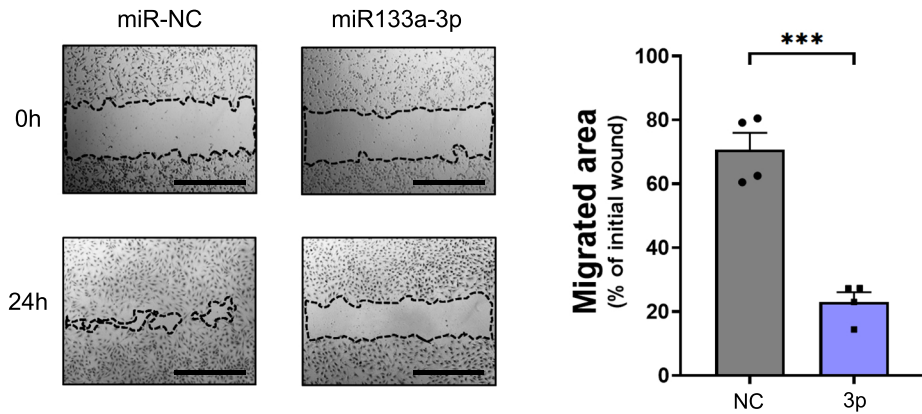

B

## HAoEC hydroxyurea

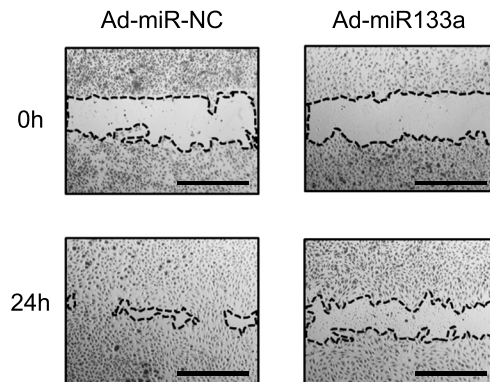

**Figure S4. miR-133a inhibits HUVEC and HAoEC migration in the presence of the proliferation inhibitor hydroxyurea.** (A) Representative images of wound-healing migration assays performed with HUVEC transfected with microRNA mimics for miR-133a-3p, or a negative control (miR-NC). Images were taken at time zero (0h) and after incubation for 24 hours in endothelial cell medium in the presence of 2 mM hydroxyurea (24h). The migrated area was calculated by subtracting the value of the non-migrated area from the wound area at time zero and expressing this as a percentage of the total area at time zero. Scale bars, 1000 μm. Data are shown as mean ± SE, n = 4. Data were analysed for statistical differences by one-way ANOVA with *post hoc* Tukey's comparison test. \*\*\*, P ≤ 0.001. (B) Human Aortic Endothelial Cells were infected with control adenovirus (Ad-miR-NC) or an adenovirus expressing miR-133a. (Ad-miR-133a) at MOI=200 for 72 hours. Motility of the infected cells was analysed in wound-healing migration assays as described in (A). Images are representative of two independent experiments. Scale bars, 1000 μm. Image J for windows bundled with 64-bit Java 1.8.0\_172 was used in this figure (<https://imagej.nih.gov/ij/>).

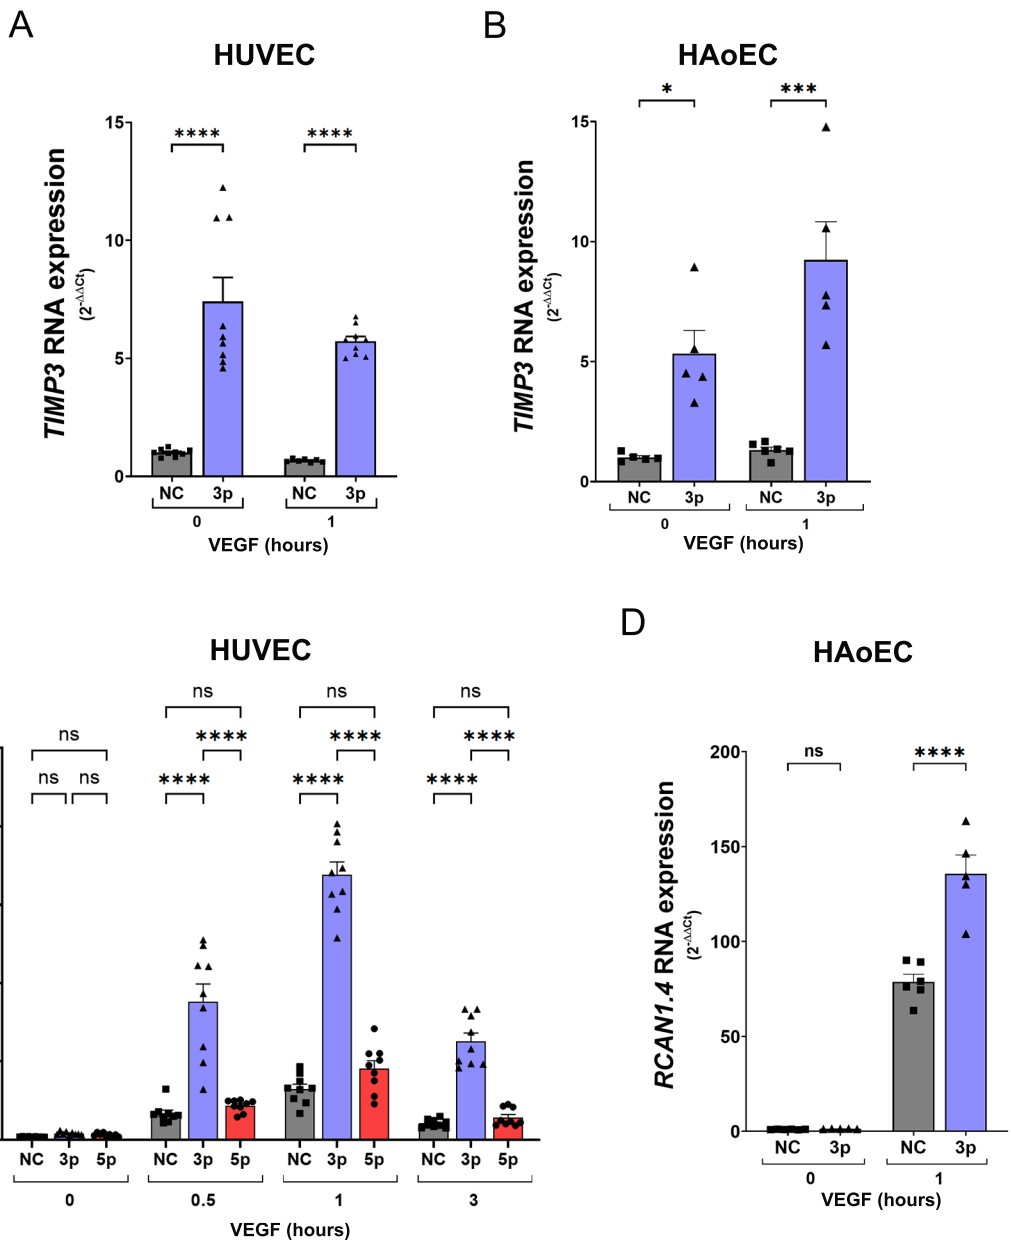

**Figure S5. Changes in gene expression of *TIMP3* and *RCAN1.4* in endothelial cells expressing miR-133a.** HUVEC (A, C) or HAoEC (B, D) transfected with miR-133a-3p (blue columns), miR-133a-5p (red columns), or negative control miR-NC (grey columns) were left unstimulated (0h) or were stimulated with VEGF-A165 as indicated. RNA levels of *TIMP3* (A, B) and *RCAN1.4* (C, D) significantly increased in miR-133a-3p transfected cells. Ct values were normalised using the Ct values for the housekeeping gene *Hprt-1*. Analysis of data was carried out using the comparative  $2^{-\Delta\Delta Ct}$  method referred to miR-NC (0h). Data are shown as mean  $\pm$  SE,  $n = 7$  in HUVEC or  $n = 5$  in AoEC. ns = non-significant; \*\*\*\*,  $P \leq 0.0001$ ; \*\*\*,  $P \leq 0.001$  two-way ANOVA with *post hoc* Tukey's comparison test for the indicated groups.

# Original blots used in figure 7A

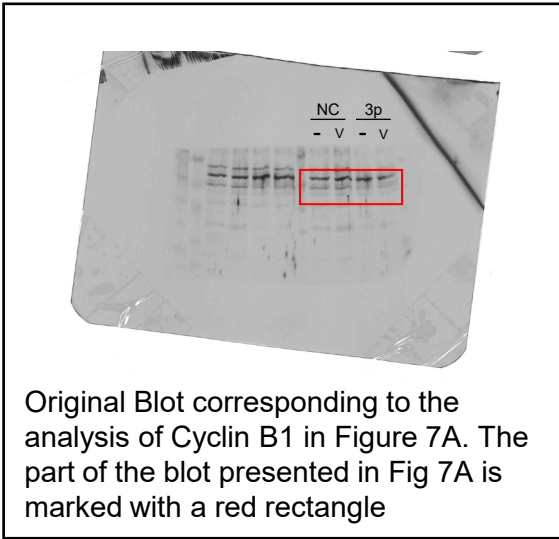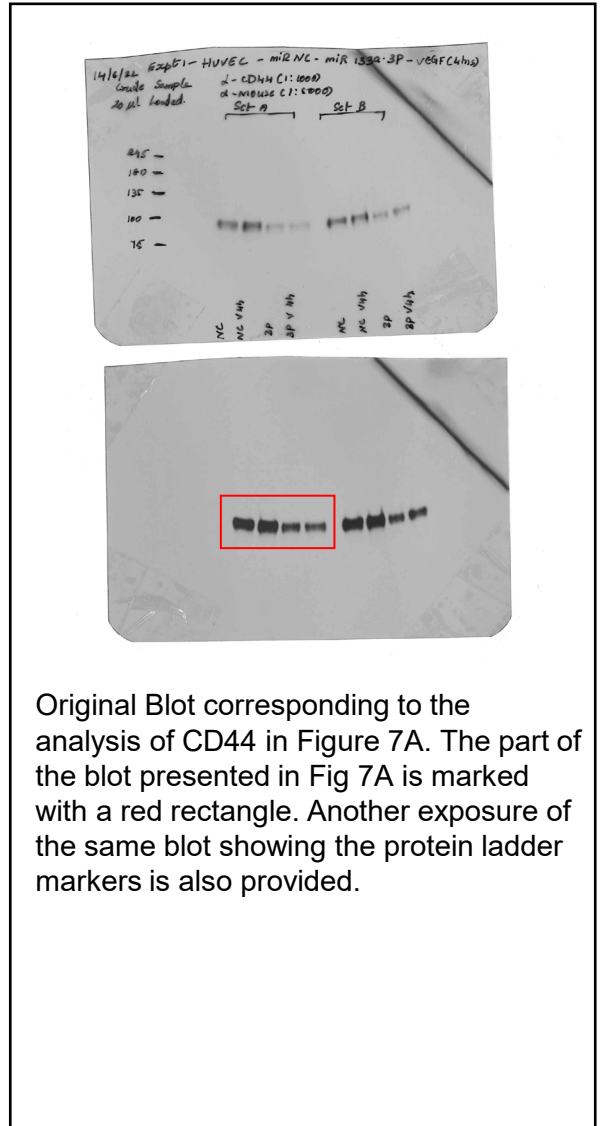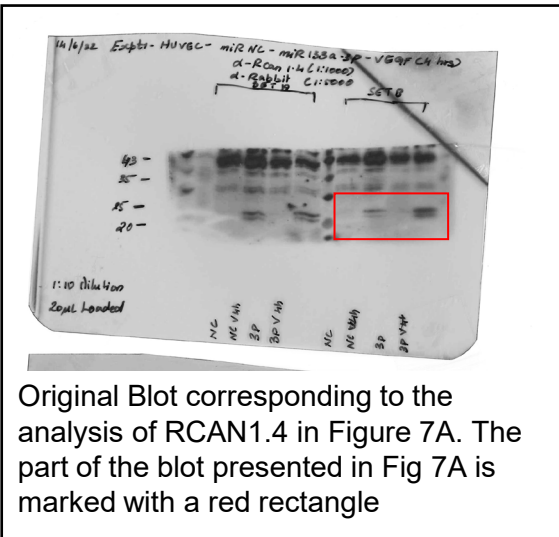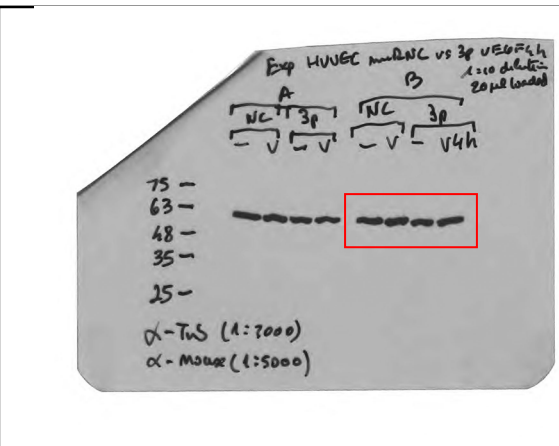

# Original blots used in figure 7B

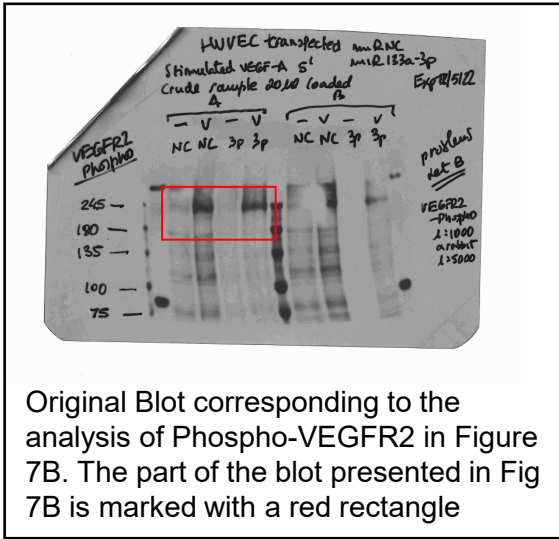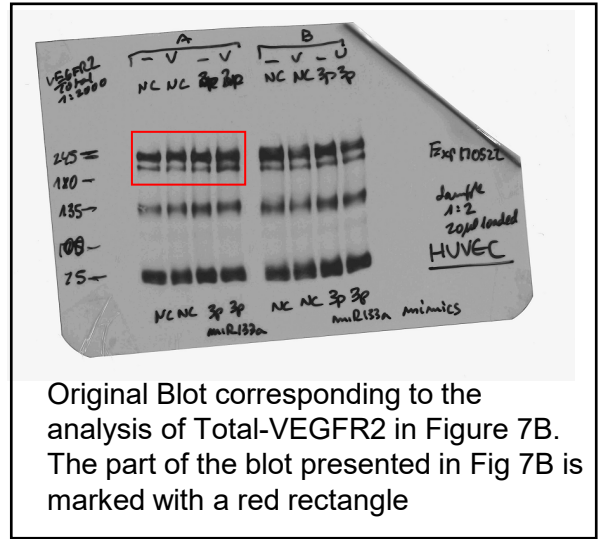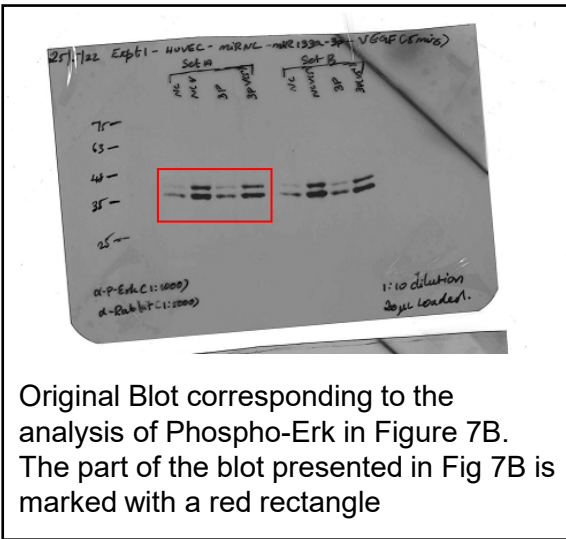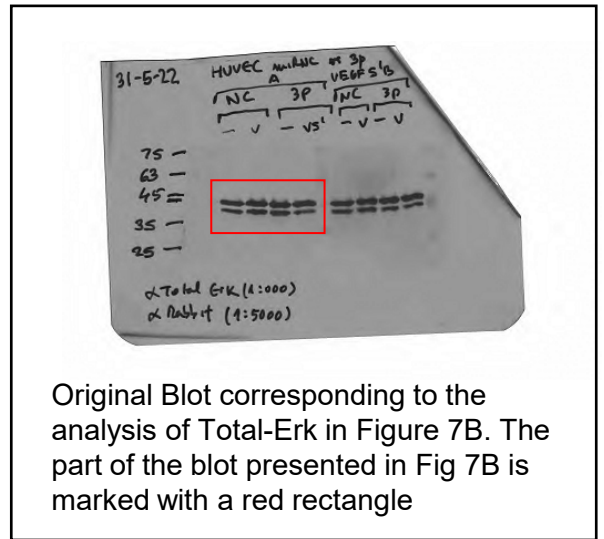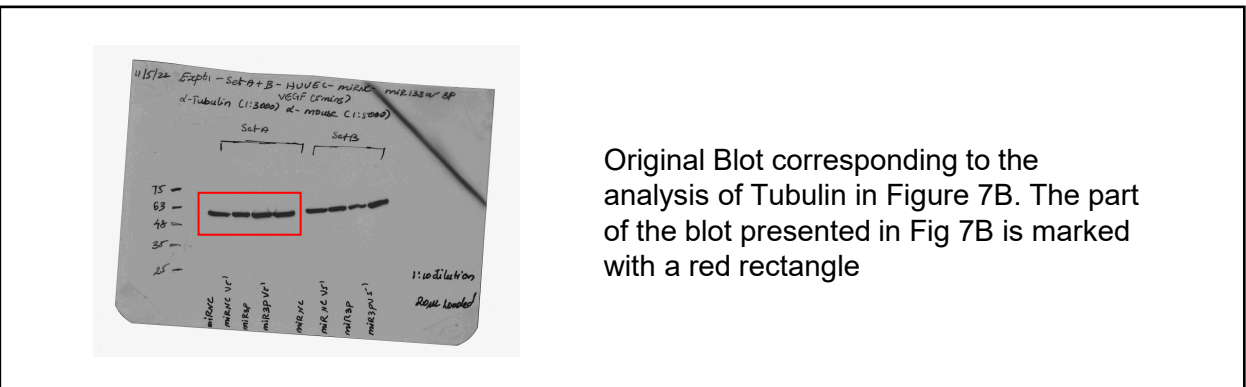

| Position | Gene Symbol | AVG ΔCt            |                | 2 <sup>-ΔCt</sup>  |                | Fold Change                       |                               | p-value  |
|----------|-------------|--------------------|----------------|--------------------|----------------|-----------------------------------|-------------------------------|----------|
|          |             | miR133a-3p VEGF 1h | miR-NC VEGF 1h | miR133a-3p VEGF 1h | miR-NC VEGF 1h | miR133a-3p VEGF 1h/miR-NC VEGF 1h | miR-NC VEGF 1h/miR-NC VEGF 1h |          |
| A01      | ADAM10      | 2.37               | 2.87           | 0.19382            | 0.136999       |                                   | 1.41                          | 0.010688 |
| A02      | ADAM17      | 4.33               | 4.38           | 0.049602           | 0.047951       |                                   | 1.03                          | 0.967439 |
| A03      | AES         | 2.39               | 2.54           | 0.191036           | 0.172456       |                                   | 1.11                          | 0.373270 |
| A04      | AXIN1       | 6.09               | 6.06           | 0.014722           | 0.014697       |                                   | 0.98                          | 0.833499 |
| A05      | CBL         | 6                  | 6.03           | 0.015696           | 0.015344       |                                   | 1.02                          | 0.802729 |
| A06      | CCND1       | 3.04               | 2.06           | 0.121559           | 0.23953        |                                   | 0.51                          | 0.032068 |
| A07      | CCNE1       | 7.54               | 6.74           | 0.005356           | 0.009343       |                                   | 0.57                          | 0.003667 |
| A08      | CD44        | 4.81               | 3.01           | 0.035679           | 0.124391       |                                   | 0.29                          | 0.002287 |
| A09      | CKN1A       | 1.98               | 2.12           | 0.254345           | 0.229741       |                                   | 1.11                          | 0.622333 |
| A10      | CFIAR       | 3.68               | 4.29           | 0.078231           | 0.051042       |                                   | 1.53                          | 0.001597 |
| A11      | CHUK        | 4.52               | 5.16           | 0.043592           | 0.028058       |                                   | 1.55                          | 0.474799 |
| A12      | CTNNB1      | 2.52               | 3.11           | 0.174488           | 0.116168       |                                   | 1.5                           | 0.165019 |
| B01      | DLL1        | 7.63               | 7.76           | 0.005062           | 0.004599       |                                   | 1.1                           | 0.868859 |
| B02      | DLL3        | 13.89              | 14.94          | 0.000066           | 0.000032       |                                   | 2.08                          | 0.500788 |
| B03      | DLL4        | 3.54               | 6.41           | 0.086118           | 0.01174        |                                   | 7.34                          | 0.002103 |
| B04      | EP300       | 5.11               | 5.08           | 0.028991           | 0.029642       |                                   | 0.98                          | 0.744398 |
| B05      | ERBB2       | 6                  | 6.48           | 0.015619           | 0.011181       |                                   | 1.4                           | 0.084305 |
| B06      | FIGF        | 12.68              | 12.13          | 0.000152           | 0.000224       |                                   | 0.68                          | 0.427723 |
| B07      | FOS         | 7.3                | 7.76           | 0.006344           | 0.004814       |                                   | 1.37                          | 0.312468 |
| B08      | FOSL1       | 3.97               | 3.84           | 0.063655           | 0.069966       |                                   | 0.91                          | 0.347284 |
| B09      | FZD7        | 11.95              | 12.28          | 0.000253           | 0.000201       |                                   | 1.26                          | 0.608977 |
| B10      | GLI1        | 11.23              | 12.12          | 0.000415           | 0.000225       |                                   | 1.85                          | 0.430816 |
| B11      | GSK3B       | 4.14               | 4.15           | 0.056579           | 0.056255       |                                   | 1.01                          | 0.985468 |
| B12      | HDAC1       | 3.91               | 4.37           | 0.066313           | 0.04834        |                                   | 1.37                          | 0.042302 |
| C01      | HES1        | 4.06               | 3.9            | 0.059933           | 0.066897       |                                   | 0.9                           | 0.748074 |
| C02      | HEY1        | 6.71               | 6.12           | 0.009553           | 0.003066       |                                   | 2.65                          | 0.003644 |
| C03      | HOXB4       | 6.25               | 6.84           | 0.002276           | 0.00381        |                                   | 0.96                          | 0.863624 |
| C04      | HIF1        | 11.48              | 13.02          | 0.00035            | 0.000121       |                                   | 2.9                           | 0.200304 |
| C05      | HD          | 6.15               | 5.63           | 0.014127           | 0.030772       |                                   | 0.46                          | 0.011005 |
| C06      | IFNG        | 15.93              | 16.78          | 0.000016           | 0.000009       |                                   | 1.81                          | 0.333035 |
| C07      | IL2RA       | 15.83              | 16.69          | 0.000017           | 0.000009       |                                   | 1.81                          | 0.355301 |
| C08      | JAG1        | 4.13               | 5.18           | 0.056924           | 0.027556       |                                   | 2.07                          | 0.060391 |
| C09      | JAG2        | 4.1                | 5.45           | 0.058398           | 0.022886       |                                   | 2.55                          | 0.008049 |
| C10      | KRT1        | 16.16              | 16.78          | 0.000014           | 0.000009       |                                   | 1.55                          | 0.308032 |
| C11      | LFNG        | 6.84               | 6.92           | 0.00875            | 0.008239       |                                   | 1.06                          | 0.840951 |
| C12      | LMO2        | 2.91               | 3.61           | 0.133194           | 0.081731       |                                   | 1.63                          | 0.038285 |
| D01      | LOR         | 16.15              | 16.31          | 0.000014           | 0.000012       |                                   | 1.12                          | 0.688941 |
| D02      | LRP5        | 7.55               | 7.59           | 0.005347           | 0.00519        |                                   | 1.03                          | 0.851724 |
| D03      | MAML1       | 6.31               | 5.87           | 0.012626           | 0.017067       |                                   | 0.74                          | 0.198066 |
| D04      | MAML2       | 6.44               | 6.51           | 0.011547           | 0.010951       |                                   | 1.05                          | 0.889567 |
| D05      | MFNG        | 3.07               | 2.83           | 0.119359           | 0.140923       |                                   | 0.85                          | 0.021107 |
| D06      | MMP7        | 8.32               | 8.22           | 0.003136           | 0.003351       |                                   | 0.94                          | 0.664009 |
| D07      | NCOR2       | 4.53               | 4.27           | 0.04326            | 0.052003       |                                   | 0.83                          | 0.495544 |
| D08      | NCSTN       | 3.27               | 3.61           | 0.103865           | 0.081666       |                                   | 1.27                          | 0.000225 |
| D09      | NFKB1       | 5.71               | 6.01           | 0.01913            | 0.015483       |                                   | 1.24                          | 0.441816 |
| D10      | NFKB2       | 5.4                | 5.68           | 0.023755           | 0.019526       |                                   | 1.22                          | 0.387127 |
| D11      | NOTCH1      | 5.99               | 6.37           | 0.015696           | 0.012083       |                                   | 1.3                           | 0.521508 |
| D12      | NOTCH2      | 6.14               | 5.67           | 0.014193           | 0.019697       |                                   | 0.72                          | 0.141066 |
| D13      | NOTCH3      | 9.74               | 9.88           | 0.001168           | 0.001064       |                                   | 1.1                           | 0.905228 |
| E01      | NOTCH4      | 4.25               | 5.81           | 0.044167           | 0.017865       |                                   | 2.47                          | 0.011642 |
| E03      | NUMB        | 4.29               | 4.21           | 0.051168           | 0.054054       |                                   | 0.95                          | 0.244417 |
| E04      | PAX5        | 15.62              | 16.36          | 0.00002            | 0.000012       |                                   | 1.67                          | 0.028959 |
| E05      | POU1F1      | 7.7                | 7.9            | 0.0048             | 0.004199       |                                   | 1.14                          | 0.366457 |
| E06      | PPARG       | 8.36               | 10.18          | 0.003044           | 0.000965       |                                   | 3.52                          | 0.000338 |
| E07      | PSEN1       | 4.63               | 4.42           | 0.040491           | 0.046872       |                                   | 0.86                          | 0.032967 |
| E08      | PSEN2       | 6                  | 6.02           | 0.015611           | 0.0154         |                                   | 1.01                          | 0.502805 |
| E09      | PSENEN      | 4.33               | 4.4            | 0.049687           | 0.047374       |                                   | 1.05                          | 0.620692 |
| E10      | PTCRA       | 14.15              | 15.3           | 0.000055           | 0.000025       |                                   | 2.22                          | 0.400245 |
| E11      | RBPJL       | 15.59              | 15.66          | 0.00002            | 0.000019       |                                   | 1.05                          | 0.763113 |
| E12      | RFNG        | 5.21               | 5.44           | 0.027062           | 0.023039       |                                   | 1.17                          | 0.088466 |
| F01      | RUNX1       | 6.81               | 6.06           | 0.008936           | 0.014977       |                                   | 0.6                           | 0.033440 |
| F02      | SELL        | 3.35               | 3.84           | 0.097817           | 0.068881       |                                   | 1.4                           | 0.006913 |
| F03      | SHH         | 11.97              | 11.35          | 0.00025            | 0.000382       |                                   | 0.65                          | 0.007158 |
| F04      | SMO         | 7.62               | 7.37           | 0.005075           | 0.006603       |                                   | 0.84                          | 0.105797 |
| F05      | SNW1        | 5.2                | 4.82           | 0.027124           | 0.035378       |                                   | 0.77                          | 0.170943 |
| F06      | STAT6       | 4.16               | 3.93           | 0.055907           | 0.065676       |                                   | 0.85                          | 0.108075 |
| F07      | TLE1        | 4.7                | 4.75           | 0.03838            | 0.037252       |                                   | 1.03                          | 0.761570 |
| F08      | WISP1       | 12.63              | 15.4           | 0.000158           | 0.000023       |                                   | 6.83                          | 0.000754 |
| F09      | ADA         | 4.92               | 4.89           | 0.033064           | 0.033743       |                                   | 0.96                          | 0.912166 |
| F10      | AFAP112     | 9.3                | 12.01          | 0.001592           | 0.000242       |                                   | 6.57                          | 0.058412 |
| F11      | DTX1        | 15.26              | 16.07          | 0.000025           | 0.000015       |                                   | 1.75                          | 0.428849 |
| F12      | H19         | 11.49              | 13.47          | 0.000347           | 0.000088       |                                   | 3.93                          | 0.032924 |
| G01      | Hes4        | 4.95               | 6.64           | 0.032401           | 0.010001       |                                   | 3.24                          | 0.044112 |
| G02      | HES5        | 13.99              | 15.62          | 0.000062           | 0.00002        |                                   | 3.11                          | 0.407130 |
| G03      | HEY2        | 10.92              | 10.17          | 0.000966           | 0.000686       |                                   | 1.11                          | 0.872876 |
| G04      | HEY1        | 16                 | 16.68          | 0.000015           | 0.00001        |                                   | 1.6                           | 0.230238 |
| G05      | NIBARP      | 5.7                | 7.11           | 0.019182           | 0.007259       |                                   | 2.64                          | 0.046670 |
| G06      | SCGB1A1     | 15.64              | 16.78          | 0.00002            | 0.000009       |                                   | 2.22                          | 0.048320 |
| G07      | SERPINA3    | 13.27              | 13.9           | 0.000101           | 0.000065       |                                   | 1.55                          | 0.348460 |
| G08      | SLC6A12     | 16.66              | 16.78          | 0.00001            | 0.000009       |                                   | 1.09                          | 0.629893 |
| G09      | SNAI2       | 10.11              | 9.59           | 0.000902           | 0.001301       |                                   | 0.69                          | 0.321168 |
| G10      | TFE1        | 16.3               | 16.58          | 0.000012           | 0.00001        |                                   | 1.21                          | 0.481258 |
| G11      | TNFSF10     | 4.19               | 4.23           | 0.054855           | 0.053357       |                                   | 1.03                          | 0.877834 |
| G12      | UBD         | 10.53              | 10.94          | 0.000678           | 0.000051       |                                   | 1.33                          | 0.547084 |
| H01      | ACTB        | -2.73              | -2.65          | 6.644773           | 6.274732       |                                   | 1.06                          | 0.419120 |
| H02      | B2M         | -0.76              | -0.36          | 1.696719           | 1.28043        |                                   | 1.33                          | 0.182271 |
| H03      | GAPDH       | -1.15              | -1.33          | 2.22983            | 2.508923       |                                   | 0.89                          | 0.269595 |
| H04      | HPRT1       | 5.96               | 5.59           | 0.016051           | 0.020728       |                                   | 0.77                          | 0.007666 |
| H05      | RPLP0       | -1.31              | -1.26          | 2.48292            | 2.393297       |                                   | 1.04                          | 0.704859 |

**Supplementary Table S1. Differential gene expression analysis of RT2 Profiler PCR Array Human Notch Signalling Pathway Plus Kit.** HUVEC transfected with miR-133a-3p or negative control miR-NC were stimulated with VEGF-A165 for 1 hour. Upregulated and downregulated genes are highlighted in red and green, respectively. Genes showing values of AVG ΔCt ≥ 10 indicating high number of amplification cycles required in the PCR analysis were not considered in further experiments to improve accuracy and reproducibility of data.



| Position | Gene Symbol | AVG ΔCt            |                | 2 <sup>-ΔΔCt</sup> |                | Fold Change                       |                                     | p-value  |
|----------|-------------|--------------------|----------------|--------------------|----------------|-----------------------------------|-------------------------------------|----------|
|          |             | miR133a-3p VEGF 1h | miR-NC VEGF 1h | miR133a-3p VEGF 1h | miR-NC VEGF 1h | miR133a-3p VEGF 1h/miR-NC VEGF 1h | miR133a-3p VEGF 1h / miR-NC VEGF 1h |          |
| A01      | ABL1        | 5.34               | 6.03           | 0.024515           | 0.015268       | 1.61                              |                                     |          |
| A02      | ANAPC2      | 6.51               | 7.12           | 0.011003           | 0.007179       | 1.53                              |                                     | 0.163561 |
| A03      | ATM         | 7.71               | 7.98           | 0.004776           | 0.003964       | 1.2                               |                                     | 0.872675 |
| A04      | ATR         | 8.28               | 8.4            | 0.003216           | 0.002964       | 1.08                              |                                     | 0.764296 |
| A05      | AURKA       | 9.76               | 5.73           | 0.009201           | 0.018801       | 0.49                              |                                     | 0.193957 |
| A06      | AURKB       | 6.17               | 7.13           | 0.001741           | 0.007153       | 0.24                              |                                     | 0.117954 |
| A07      | BCCIP       | 4.74               | 4.44           | 0.037322           | 0.046224       | 0.81                              |                                     | 0.385842 |
| A08      | BCL2        | 8.81               | 10.45          | 0.002229           | 0.000715       | 3.12                              |                                     | 0.002742 |
| A09      | BIRC5       | 12.19              | 10.18          | 0.002015           | 0.000603       | 0.25                              |                                     | 0.113855 |
| A10      | BRC1A       | 10.06              | 8.42           | 0.000936           | 0.00291        | 0.32                              |                                     | 0.126832 |
| A11      | BRC1A2      | 9.49               | 9.05           | 0.001395           | 0.001889       | 0.74                              |                                     | 0.510409 |
| A12      | CASP3       | 4.08               | 4.58           | 0.05904            | 0.041737       | 1.41                              |                                     | 0.568454 |
| B01      | CCNA2       | 7.19               | 4.63           | 0.006844           | 0.040488       | 0.17                              |                                     | 0.007077 |
| B02      | CCNB1       | 6.88               | 4.77           | 0.008902           | 0.036538       | 0.23                              |                                     | 0.014929 |
| B03      | CCNB2       | 8.04               | 5.97           | 0.003788           | 0.019924       | 0.24                              |                                     | 0.101785 |
| B04      | CCNC        | 6.14               | 6.9            | 0.014162           | 0.003999       | 1.69                              |                                     | 0.310072 |
| B05      | CCND1       | 2.69               | 2.97           | 0.151598           | 0.127381       | 1.22                              |                                     | 0.750907 |
| B06      | CCND2       | 6.84               | 8.46           | 0.008759           | 0.00283        | 3.09                              |                                     | 0.280935 |
| B07      | CCND3       | 3.61               | 5.03           | 0.082101           | 0.036607       | 2.68                              |                                     | 0.029723 |
| B08      | CCNE1       | 7.52               | 7.47           | 0.005459           | 0.005632       | 0.97                              |                                     | 0.907534 |
| B09      | CCNF        | 7.33               | 7.27           | 0.008214           | 0.006487       | 0.96                              |                                     | 0.573206 |
| B10      | CCNG1       | 1.48               | 3.26           | 0.388997           | 0.120426       | 3.44                              |                                     | 0.037799 |
| B11      | CCNG2       | 5.08               | 5.59           | 0.029496           | 0.020746       | 1.42                              |                                     | 0.194174 |
| B12      | CCNH        | 6.44               | 7.4            | 0.015121           | 0.00594        | 1.94                              |                                     | 0.570288 |
| C01      | CNT1        | 6.45               | 7.22           | 0.011417           | 0.009717       | 1.7                               |                                     | 0.805792 |
| C02      | CDC16       | 4.48               | 5.2            | 0.044827           | 0.027234       | 1.65                              |                                     | 0.533739 |
| C03      | CDC20       | 8.37               | 6.42           | 0.003019           | 0.011709       | 0.26                              |                                     | 0.08117  |
| C04      | CDC25A      | 8.32               | 8.1            | 0.00313            | 0.003657       | 0.86                              |                                     | 0.57382  |
| C05      | CDC25C      | 12.28              | 10.35          | 0.000201           | 0.000764       | 0.26                              |                                     | 0.286847 |
| C06      | CDC34       | 5.74               | 6.49           | 0.018961           | 0.011092       | 1.68                              |                                     | 0.240041 |
| C07      | CDK6        | 7.69               | 6.54           | 0.004951           | 0.010772       | 0.6                               |                                     | 0.223499 |
| C08      | CDK1        | 6.57               | 3.44           | 0.010568           | 0.0921         | 0.11                              |                                     | 0.000561 |
| C09      | CDK2        | 8.22               | 8.2            | 0.013418           | 0.013595       | 0.99                              |                                     | 0.963534 |
| C10      | CDK4        | 4.09               | 4.72           | 0.058805           | 0.038073       | 1.54                              |                                     | 0.545356 |
| C11      | CDK5R1      | 9.49               | 9.87           | 0.001387           | 0.001667       | 1.3                               |                                     | 0.530816 |
| C12      | CDK5RAP1    | 9.72               | 10.39          | 0.001187           | 0.000743       | 1.6                               |                                     | 0.596426 |
| D01      | CDK6        | 4.61               | 6.94           | 0.04084            | 0.008172       | 5                                 |                                     | 0.007356 |
| D02      | CDK7        | 5.02               | 5.13           | 0.030758           | 0.028553       | 1.08                              |                                     | 0.98945  |
| D03      | CDK8        | 7.4                | 7.42           | 0.009916           | 0.005848       | 1.01                              |                                     | 0.915495 |
| D04      | CDKN1A      | 2.25               | 3.54           | 0.209834           | 0.085955       | 2.44                              |                                     | 0.157594 |
| D05      | CDKN1B      | 4.96               | 5.77           | 0.032056           | 0.018345       | 1.75                              |                                     | 0.486002 |
| D06      | CDKN2A      | 11.48              | 12.12          | 0.000349           | 0.000224       | 1.55                              |                                     | 0.482816 |
| D07      | CDKN2B      | 7.18               | 8.71           | 0.00689            | 0.002394       | 2.88                              |                                     | 0.094351 |
| D08      | CDKN3       | 7.19               | 6.41           | 0.008688           | 0.011727       | 0.59                              |                                     | 0.33057  |
| D09      | CHEK1       | 7.44               | 6.66           | 0.00574            | 0.009899       | 0.58                              |                                     | 0.283328 |
| D10      | CHEK2       | 8.09               | 8.63           | 0.003957           | 0.00253        | 1.45                              |                                     | 0.432738 |
| D11      | CKS1B       | 6.14               | 4.94           | 0.014219           | 0.032558       | 0.44                              |                                     | 0.159196 |
| D12      | CKS2        | 4.19               | 4.44           | 0.054895           | 0.040506       | 1.19                              |                                     | 0.769768 |
| E01      | CUL1        | 5.12               | 5.19           | 0.02882            | 0.027368       | 1.05                              |                                     | 0.918052 |
| E02      | CUL2        | 5.1                | 5.55           | 0.029246           | 0.02138        | 1.37                              |                                     | 0.205873 |
| E03      | CUL3        | 3.82               | 4.62           | 0.070815           | 0.040534       | 1.75                              |                                     | 0.448347 |
| E04      | E2F1        | 8.13               | 7.39           | 0.003577           | 0.005964       | 0.6                               |                                     | 0.307408 |
| E05      | E2F4        | 4.36               | 5.41           | 0.048904           | 0.023558       | 2.06                              |                                     | 0.501406 |
| E06      | GADD45A     | 6.33               | 5.55           | 0.012446           | 0.021391       | 0.58                              |                                     | 0.133284 |
| E07      | GTSF1       | 6.37               | 6.45           | 0.003024           | 0.014404       | 0.27                              |                                     | 0.807804 |
| E08      | HUS1        | 5.26               | 6.23           | 0.025811           | 0.013311       | 1.94                              |                                     | 0.541133 |
| E09      | KNTC1       | 8.79               | 8.1            | 0.002266           | 0.003652       | 0.62                              |                                     | 0.428603 |
| E10      | KPNA2       | 2.09               | 2.75           | 0.234331           | 0.148985       | 1.57                              |                                     | 0.794139 |
| E11      | MAD2L1      | 7.9                | 6.16           | 0.004173           | 0.014016       | 0.3                               |                                     | 0.130544 |
| E12      | MAD2L2      | 9.12               | 8.91           | 0.001795           | 0.002077       | 0.86                              |                                     | 0.564885 |
| F01      | MCM2        | 7.9                | 6.7            | 0.004176           | 0.009641       | 0.43                              |                                     | 0.060139 |
| F02      | MCM3        | 6.32               | 5.57           | 0.012524           | 0.021959       | 0.59                              |                                     | 0.182696 |
| F03      | MCM4        | 7.4                | 6.29           | 0.009935           | 0.012751       | 0.46                              |                                     | 0.307947 |
| F04      | MCM5        | 6.26               | 5.84           | 0.012896           | 0.017422       | 0.74                              |                                     | 0.579795 |
| F05      | MDM2        | 2.68               | 3.82           | 0.155521           | 0.070568       | 2.2                               |                                     | 0.104164 |
| F06      | MKI67       | 7                  | 5.16           | 0.007788           | 0.0279         | 0.28                              |                                     | 0.245959 |
| F07      | MNAT1       | 6.4                | 7.08           | 0.011809           | 0.007386       | 1.6                               |                                     | 0.551554 |
| F08      | MRE11A      | 6.51               | 6.8            | 0.010994           | 0.008984       | 1.22                              |                                     | 0.966266 |
| F09      | NBN         | 4.84               | 5.69           | 0.034921           | 0.019065       | 1.8                               |                                     | 0.092656 |
| F10      | RAD1        | 6.89               | 7.16           | 0.019111           | 0.009099       | 1.59                              |                                     | 0.476448 |
| F11      | RAD17       | 6.4                | 7.3            | 0.011683           | 0.006341       | 1.87                              |                                     | 0.241411 |
| F12      | RAD51       | 9.4                | 8.35           | 0.001476           | 0.003064       | 0.48                              |                                     | 0.236303 |
| G01      | RAD9A       | 8.4                | 8.51           | 0.002964           | 0.002752       | 1.08                              |                                     | 0.936191 |
| G02      | RB1         | 5.49               | 5.56           | 0.022225           | 0.021268       | 1.05                              |                                     | 0.933481 |
| G03      | RBBP8       | 8.25               | 8.15           | 0.00329            | 0.003516       | 0.94                              |                                     | 0.936822 |
| G04      | RBL1        | 7.71               | 7.21           | 0.004772           | 0.006754       | 0.71                              |                                     | 0.415562 |
| G05      | RBL2        | 5.35               | 5.93           | 0.024592           | 0.016415       | 1.5                               |                                     | 0.548759 |
| G06      | SERTAD1     | 6.5                | 7.16           | 0.011949           | 0.006976       | 1.58                              |                                     | 0.297238 |
| G07      | SFP2        | 7.69               | 7.14           | 0.007346           | 0.007102       | 1.03                              |                                     | 0.731383 |
| G08      | STMN1       | 2.5                | 1.52           | 0.176889           | 0.348554       | 0.51                              |                                     | 0.032378 |
| G09      | TFDP1       | 4.22               | 3.63           | 0.053994           | 0.080782       | 0.66                              |                                     | 0.455342 |
| G10      | TFDP2       | 7.18               | 7.67           | 0.008887           | 0.004909       | 1.4                               |                                     | 0.922733 |
| G11      | TP53        | 3.04               | 3.74           | 0.121287           | 0.074857       | 1.62                              |                                     | 0.148892 |
| G12      | WEE1        | 5.01               | 5.49           | 0.031              | 0.022296       | 1.39                              |                                     | 0.373908 |
| H01      | ACTB        | 2.49               | 2.53           | 5.637138           | 5.76735        | 0.98                              |                                     | 0.847267 |
| H02      | B2M         | -0.12              | 0.22           | 1.839723           | 3.280933       | 1.26                              |                                     | 0.422386 |
| H03      | GAPDH       | 1.18               | 1.71           | 2.269950           | 3.280933       | 0.7                               |                                     | 0.385742 |
| H04      | HPRT1       | 4.65               | 4.97           | 0.039753           | 0.032014       | 1.24                              |                                     | 0.485624 |
| H05      | RPLP0       | -0.85              | -0.95          | 1.807953           | 1.929933       | 0.94                              |                                     | 0.734311 |

**Supplementary Table S2. Differential gene expression analysis of RT2 Profiler PCR Array Human Cell Cycle Kit.** HUVEC transfected with miR-133a-3p or negative control miR-NC were stimulated with VEGF-A165 for 1 hour. Upregulated and downregulated genes are highlighted in red and green, respectively. Genes showing values of AVG ΔCt ≥ 10 indicating high number of amplification cycles required in the PCR analysis were not considered in further experiments to improve accuracy and reproducibility of data.

| Position | Gene_Symbol | AVG ΔCt            |                | 2 <sup>-ΔCt</sup>  |                | Fold Change               |                             | p-value |
|----------|-------------|--------------------|----------------|--------------------|----------------|---------------------------|-----------------------------|---------|
|          |             | miR133a-3p VEGF th | miR-NC VEGF th | miR133a-3p VEGF th | miR-NC VEGF th | miR133a-3p VEGF th/miR-NC | miR133a-3p VEGF th / miR-NC |         |
| A01      | ADAMT51     | 3.51               | 4.63           | 0.007613           | 0.004552       | 2.17                      | 0.009728                    |         |
| A02      | ADAMT513    | 12.78              | 13.14          | 0.000145           | 0.000111       | 1.30                      | 0.425539                    |         |
| A03      | ADAMT58     | 16.85              | 16.41          | 0.000008           | 0.000011       | 0.73                      | 0.557347                    |         |
| A04      | CD44        | 3.12               | 2.32           | 0.115291           | 0.289893       | 0.57                      | 0.032911                    |         |
| A05      | CDH1        | 16.85              | 17.27          | 0.000008           | 0.000006       | 1.33                      | 0.752007                    |         |
| A06      | CLEC3B      | 13.88              | 13.13          | 0.000007           | 0.000112       | 0.60                      | 0.842833                    |         |
| A07      | CNTN1       | 14.68              | 13.55          | 0.000039           | 0.000084       | 0.46                      | 0.347898                    |         |
| A08      | COL1A1      | 14.84              | 16.46          | 0.000032           | 0.000011       | 2.87                      | 0.291711                    |         |
| A09      | COL12A1     | 6.17               | 7.21           | 0.013542           | 0.006753       | 2.05                      | 0.153185                    |         |
| A10      | COL14A1     | 13.18              | 11.44          | 0.000215           | 0.000359       | 0.60                      | 0.288410                    |         |
| A11      | COL15A1     | 14.64              | 11.91          | 0.000039           | 0.000016       | 2.40                      | 0.472859                    |         |
| A12      | COL16A1     | 11.06              | 11.62          | 0.000289           | 0.000318       | 0.85                      | 0.625143                    |         |
| B01      | COL1A1      | 14.86              | 12.47          | 0.000034           | 0.000178       | 0.19                      | 0.054788                    |         |
| B02      | COL4A2      | 0.35               | 1.17           | 0.785597           | 0.44353        | 1.77                      | 0.185808                    |         |
| B03      | COL5A1      | 2.22               | 3.33           | 0.214854           | 0.099276       | 2.16                      | 0.141926                    |         |
| B04      | COL6A1      | 5.58               | 6.02           | 0.020913           | 0.015454       | 1.35                      | 0.467934                    |         |
| B05      | COL6A2      | 10.59              | 10.13          | 0.000651           | 0.000892       | 0.73                      | 0.975060                    |         |
| B06      | COL7A1      | 14.68              | 14.35          | 0.000038           | 0.000048       | 0.80                      | 0.765503                    |         |
| B07      | COL8A1      | 4.25               | 3.45           | 0.05246            | 0.09175        | 0.57                      | 0.251567                    |         |
| B08      | CTGF        | -0.35              | -0.8           | 1.272852           | 1.735088       | 0.73                      | 0.601233                    |         |
| B09      | CTNNA1      | 2.02               | 1.99           | 0.245921           | 0.251472       | 0.98                      | 0.961821                    |         |
| B10      | CTNNB1      | 2.57               | 3.55           | 0.188494           | 0.085373       | 1.97                      | 0.024149                    |         |
| B11      | CTNND1      | 3.42               | 3              | 0.093283           | 0.125032       | 0.75                      | 0.264605                    |         |
| B12      | CTNND2      | 16.8               | 15.62          | 0.000009           | 0.00002        | 0.44                      | 0.336888                    |         |
| C01      | ECM1        | 9.44               | 9.05           | 0.001437           | 0.001885       | 0.76                      | 0.640300                    |         |
| C02      | FN1         | -2.43              | -1.94          | 5.375817           | 3.837224       | 1.40                      | 0.256214                    |         |
| C03      | HAS1        | 13.49              | 13.91          | 0.000087           | 0.000065       | 1.34                      | 0.941511                    |         |
| C04      | ICAM1       | 3.17               | 4              | 0.111119           | 0.062804       | 1.77                      | 0.116271                    |         |
| C05      | ITGA1       | 7.13               | 8.1            | 0.00716            | 0.003852       | 1.96                      | 0.251296                    |         |
| C06      | ITGA2       | 3.84               | 3.48           | 0.096607           | 0.089804       | 0.78                      | 0.014392                    |         |
| C07      | ITGA3       | 3.25               | 2.89           | 0.105097           | 0.134514       | 0.78                      | 0.497416                    |         |
| C08      | ITGA4       | 6.49               | 7.9            | 0.011127           | 0.004184       | 2.66                      | 0.345427                    |         |
| C09      | ITGA5       | 0.44               | 0.9            | 0.739286           | 0.535757       | 1.38                      | 0.188920                    |         |
| C10      | ITGA6       | 2.1                | 3.27           | 0.232914           | 0.103672       | 2.25                      | 0.004711                    |         |
| C11      | ITGA7       | 13.45              | 13.93          | 0.00009            | 0.000064       | 1.40                      | 0.191173                    |         |
| C12      | ITGA8       | 11.79              | 15.66          | 0.000282           | 0.000019       | 14.60                     | 0.001639                    |         |
| D01      | ITGAL       | 15.52              | 16.38          | 0.000021           | 0.000012       | 1.81                      | 0.231277                    |         |
| D02      | ITGAM       | 16.59              | 16.47          | 0.00001            | 0.000011       | 0.92                      | 0.850826                    |         |
| D03      | ITGAV       | 1.72               | 2.31           | 0.302769           | 0.202065       | 1.50                      | 0.097940                    |         |
| D04      | ITGB1       | -0.32              | -0.06          | 1.250113           | 1.039281       | 1.20                      | 0.095719                    |         |
| D05      | ITGB2       | 10.98              | 12.45          | 0.000495           | 0.000179       | 2.76                      | 0.153679                    |         |
| D06      | ITGB3       | 4.55               | 4.41           | 0.042643           | 0.048962       | 0.91                      | 0.731497                    |         |
| D07      | ITGB4       | 6.89               | 6.58           | 0.008432           | 0.010462       | 0.81                      | 0.652303                    |         |
| D08      | ITGB5       | 2.54               | 3.01           | 0.171767           | 0.123762       | 1.39                      | 0.366620                    |         |
| D09      | ANOS1       | 14.11              | 12.67          | 0.000056           | 0.000154       | 0.37                      | 0.124574                    |         |
| D10      | LAMA1       | 15.86              | 17.27          | 0.000017           | 0.000006       | 2.65                      | 0.229367                    |         |
| D11      | LAMA2       | 9.66               | 10.19          | 0.001232           | 0.000854       | 1.44                      | 0.430870                    |         |
| D12      | LAMA3       | 9.18               | 8.99           | 0.001719           | 0.001964       | 0.88                      | 0.678911                    |         |
| E01      | LAMB1       | 1.13               | 1.58           | 0.456631           | 0.334105       | 1.37                      | 0.201049                    |         |
| E02      | LAMB3       | 9.75               | 8.26           | 0.001163           | 0.003255       | 0.38                      | 0.256610                    |         |
| E03      | LAMC1       | 0.89               | 1.36           | 0.538577           | 0.389106       | 1.38                      | 0.056254                    |         |
| E04      | MMP1        | -0.53              | -0.02          | 1.4419             | 1.017202       | 1.42                      | 0.238318                    |         |
| E05      | MMP10       | 4.58               | 4.12           | 0.041799           | 0.057384       | 0.73                      | 0.637562                    |         |
| E06      | MMP11       | 7.68               | 7.11           | 0.00487            | 0.007256       | 0.67                      | 0.424430                    |         |
| E07      | MMP12       | 10.63              | 14.78          | 0.00063            | 0.000036       | 17.71                     | 0.373191                    |         |
| E08      | MMP13       | 16.48              | 16.23          | 0.000011           | 0.000013       | 0.84                      | 0.628353                    |         |
| E09      | MMP14       | 2.4                | 2.19           | 0.189256           | 0.216887       | 0.87                      | 0.871463                    |         |
| E10      | MMP15       | 12.49              | 13.47          | 0.000174           | 0.000088       | 1.98                      | 0.231498                    |         |
| E11      | MMP16       | 5.69               | 6.27           | 0.019349           | 0.012915       | 1.50                      | 0.183187                    |         |
| E12      | MMP2        | 1.11               | 0.97           | 0.462092           | 0.50978        | 0.91                      | 0.573546                    |         |
| F01      | MMP3        | 13.73              | 13.89          | 0.000074           | 0.000086       | 1.12                      | 0.731364                    |         |
| F02      | MMP7        | 10.01              | 9.54           | 0.000971           | 0.001345       | 0.72                      | 0.818732                    |         |
| F03      | MMP8        | 16.38              | 16.57          | 0.000012           | 0.00001        | 1.13                      | 0.813477                    |         |
| F04      | MMP9        | 16.32              | 15.66          | 0.000012           | 0.000019       | 0.63                      | 0.402307                    |         |
| F05      | NCAM1       | 13.29              | 15.91          | 0.0001             | 0.000016       | 6.17                      | 0.046454                    |         |
| F06      | PECAM1      | 3.31               | 3.93           | 0.106651           | 0.065422       | 1.54                      | 0.621359                    |         |
| F07      | SELE        | 5.1                | 5.97           | 0.029148           | 0.015907       | 1.83                      | 0.402759                    |         |
| F08      | SELL        | 9.08               | 7.93           | 0.001846           | 0.004089       | 0.45                      | 0.074673                    |         |
| F09      | SELP        | 7.77               | 6.92           | 0.004583           | 0.00828        | 0.55                      | 0.205867                    |         |
| F10      | SGCE        | 4.99               | 5.51           | 0.031477           | 0.021936       | 1.43                      | 0.251018                    |         |
| F11      | SPARC       | -1.58              | -0.56          | 2.994117           | 1.47938        | 2.02                      | 0.001120                    |         |
| F12      | SPG7        | 5.56               | 5.51           | 0.021163           | 0.021955       | 0.96                      | 0.954220                    |         |
| G01      | SPP1        | 9.38               | 10.76          | 0.001504           | 0.000578       | 2.60                      | 0.302247                    |         |
| G02      | TGFB1       | 4.75               | 5.62           | 0.037102           | 0.020382       | 1.82                      | 0.287751                    |         |
| G03      | THBS1       | -3.9               | -2.88          | 14.896099          | 7.378099       | 2.02                      | 0.015251                    |         |
| G04      | THBS2       | 10.27              | 11.16          | 0.000811           | 0.000437       | 1.85                      | 0.406394                    |         |
| G05      | THBS3       | 9.68               | 8.72           | 0.001221           | 0.002372       | 0.51                      | 0.121761                    |         |
| G06      | TMP1        | 4.58               | 4.18           | 0.041804           | 0.055082       | 0.76                      | 0.243837                    |         |
| G07      | TMP2        | 0.64               | 0.84           | 0.642928           | 0.559352       | 1.15                      | 0.565337                    |         |
| G08      | TMP3        | 7.99               | 11.04          | 0.003943           | 0.000476       | 8.29                      | 0.386948                    |         |
| G09      | TNC         | 16.48              | 14.38          | 0.000011           | 0.000047       | 0.24                      | 0.288267                    |         |
| G10      | VCAM1       | 9.01               | 8.13           | 0.001942           | 0.00357        | 0.54                      | 0.812977                    |         |
| G11      | VCAN        | 14.3               | 11.39          | 0.000049           | 0.000373       | 0.13                      | 0.242396                    |         |
| G12      | VTN         | 11.24              | 13.16          | 0.000413           | 0.000109       | 3.77                      | 0.325615                    |         |
| H01      | ACTB        | -2.91              | -2.88          | 7.510101           | 7.375274       | 1.02                      | 0.827371                    |         |
| H02      | B2M         | -0.27              | -0.37          | 1.207778           | 1.288915       | 0.94                      | 0.742964                    |         |
| H03      | GAPDH       | -1.44              | -1.29          | 2.718774           | 2.444897       | 1.11                      | 0.801017                    |         |
| H04      | HPRT1       | 5.66               | 5.36           | 0.019748           | 0.024336       | 0.81                      | 0.299149                    |         |
| H05      | RPLP0       | -1.04              | -0.82          | 2.05343            | 1.787895       | 1.16                      | 0.687373                    |         |

**Supplementary Table S3. Differential gene expression analysis of RT2 Profiler PCR Array Human Extracellular Matrix & Cell Adhesion Molecules Kit.** HUVEC transfected with miR-133a-3p or negative control miR-NC were stimulated with VEGF-A165 for 4 hour. Upregulated and downregulated genes are highlighted in red and green, respectively. Genes showing values of AVG ΔCt ≥ 10 indicating high number of amplification cycles required in the PCR analysis were not considered in further experiments to improve accuracy and reproducibility of data.

| GENES   | miR-NC 0h |      |      |      |      |      |      |      |      | miR-133a-3p 0h |      |       |       |       |       |      |      |      |
|---------|-----------|------|------|------|------|------|------|------|------|----------------|------|-------|-------|-------|-------|------|------|------|
|         | 0.64      | 1.49 | 1.05 | 1.04 | 0.94 | 1.03 | 1.02 | 0.96 | 1.02 | 0.29           | 0.35 | 0.38  | 0.26  | 0.30  | 0.31  | 0.51 | 0.59 | 0.59 |
| PLAUR   | 0.64      | 1.49 | 1.05 | 1.04 | 0.94 | 1.03 | 1.02 | 0.96 | 1.02 | 0.29           | 0.35 | 0.38  | 0.26  | 0.30  | 0.31  | 0.51 | 0.59 | 0.59 |
| MSN     | 0.91      | 1.26 | 0.87 | 0.98 | 0.97 | 1.05 | 0.85 | 1.27 | 0.92 | 0.51           | 0.70 | 0.50  | 0.58  | 0.65  | 0.62  | 0.59 | 0.61 | 0.59 |
| RCAN1.4 | 1.01      | 0.91 | 1.09 | 0.94 | 1.10 | 0.97 | 0.99 | 0.98 | 1.04 | 2.06           | 1.81 | 2.37  | 1.17  | 1.39  | 1.38  | 1.33 | 1.46 | 1.45 |
| CD44    | 1.00      | 1.31 | 0.76 | 0.91 | 1.00 | 1.09 | 1.06 | 0.95 | 0.99 | 0.18           | 0.34 | 0.21  | 0.24  | 0.21  | 0.20  | 0.47 | 0.33 | 0.50 |
| ID1     | 0.79      | 2.47 | 0.51 | 1.12 | 0.94 | 0.95 | 1.71 | 0.35 | 1.69 | 0.19           | 0.30 | 0.22  | 0.38  | 0.34  | 0.37  | 0.70 | 0.76 | 0.58 |
| CCNE1   | 0.75      | 0.95 | 1.41 | 0.85 | 1.08 | 1.09 | 0.78 | 1.25 | 1.03 | 0.86           | 1.07 | 1.06  | 0.63  | 0.70  | 0.69  | 0.64 | 0.71 | 0.68 |
| CCND1   | 0.80      | 0.99 | 1.25 | 0.92 | 1.07 | 1.01 | 0.80 | 1.24 | 1.01 | 0.95           | 1.14 | 1.29  | 0.83  | 0.91  | 0.73  | 0.59 | 0.79 | 0.83 |
| DLL4    | 1.02      | 0.84 | 1.17 | 0.71 | 1.11 | 1.26 | 0.90 | 1.13 | 0.98 | 8.28           | 8.05 | 13.28 | 9.04  | 11.88 | 10.08 | 8.16 | 7.74 | 6.74 |
| HEY1    | 0.97      | 1.09 | 0.95 | 1.00 | 0.97 | 1.03 | 1.04 | 1.01 | 0.95 | 4.65           | 4.59 | 5.04  | 3.46  | 3.76  | 3.97  | 2.67 | 1.47 | 5.81 |
| JAG2    | 0.69      | 1.29 | 1.13 | 0.70 | 1.01 | 1.40 | 0.73 | 1.23 | 1.11 | 3.69           | 4.07 | 3.96  | 3.53  | 3.41  | 3.41  | 2.81 | 3.30 | 2.82 |
| NOTCH4  | 0.79      | 1.20 | 1.06 | 0.79 | 1.03 | 1.22 | 1.04 | 1.01 | 0.96 | 3.72           | 4.01 | 4.02  | 4.35  | 6.35  | 4.92  | 4.19 | 3.84 | 2.69 |
| NRARP   | 0.87      | 1.04 | 1.10 | 0.79 | 0.94 | 1.34 | 0.82 | 1.09 | 1.12 | 3.48           | 3.59 | 3.09  | 2.98  | 3.66  | 4.23  | 2.99 | 2.52 | 2.65 |
| HES4    | 0.83      | 1.24 | 0.97 | 0.92 | 0.94 | 1.15 | 0.75 | 1.11 | 1.19 | 4.84           | 5.74 | 5.02  | 4.10  | 5.33  | 4.79  | 4.59 | 4.82 | 3.27 |
| TIMP3   | 1.15      | 0.78 | 1.12 | 0.95 | 1.02 | 1.03 | 1.26 | 0.81 | 0.98 | 10.98          | 10.9 | 12.24 | 5.156 | 5.643 | 4.86  | 5.92 | 6.38 | 4.59 |
| ADAMTS1 | 0.99      | 1.41 | 0.72 | nd   | nd   | nd   | 0.91 | 1.28 | 0.86 | 0.70           | 1.02 | 0.85  | nd    | nd    | nd    | 0.66 | 0.49 | 0.73 |
| ITGa6   | 1.09      | 0.82 | 1.11 | 0.99 | 1.03 | 0.97 | 0.90 | 1.40 | 1.12 | 2.07           | 2.29 | 2.31  | 2.03  | 1.84  | 2.06  | 1.59 | 2.41 | 1.59 |
| THBS1   | 1.07      | 1.01 | 0.92 | 0.96 | 0.97 | 1.08 | 0.78 | 1.40 | 0.91 | 1.75           | 2.48 | 1.70  | 1.90  | 2.21  | 1.89  | 1.90 | 1.47 | 1.50 |
| SPARC   | 0.86      | 0.98 | 1.19 | 0.74 | 1.19 | 1.13 | 0.80 | 1.07 | 1.17 | 2.79           | 2.64 | 3.45  | 2.76  | 2.67  | 2.65  | 2.25 | 2.34 | 2.25 |
| CDK1    | 0.89      | nd   | 1.13 | 0.85 | 0.98 | 1.20 | 0.76 | 1.08 | 1.22 | 0.22           | 0.26 | 0.22  | 0.19  | 0.19  | 0.22  | 0.22 | 0.23 | 0.28 |
| CCNA2   | 0.89      | nd   | 1.12 | 0.77 | 1.21 | 1.07 | 0.88 | 1.00 | 1.13 | 0.21           | 0.22 | 0.22  | 0.14  | 0.15  | 0.16  | 0.14 | 0.19 | 0.24 |
| CCNB1   | 0.86      | nd   | 1.16 | 0.83 | 1.04 | 1.16 | 0.95 | 1.01 | 1.05 | 0.27           | 0.30 | 0.25  | 0.18  | 0.22  | 0.23  | 0.20 | 0.26 | 0.28 |
| MCM2    | 0.84      | 1.03 | 1.15 | 0.90 | 1.00 | 1.10 | 1.00 | 0.98 | 1.02 | 0.38           | 0.42 | 0.42  | 0.37  | 0.42  | 0.42  | 0.60 | 0.53 | 0.51 |
| MCM4    | 0.80      | 1.07 | 1.17 | 0.80 | 1.11 | 1.13 | 0.85 | 0.89 | 1.32 | 0.43           | 0.47 | 0.40  | 0.35  | 0.43  | 0.38  | 0.35 | 0.40 | 0.58 |
| CCND3   | 0.65      | 1.72 | 0.89 | 0.76 | 1.14 | 1.16 | 0.87 | 1.05 | 1.09 | 1.22           | 1.32 | 1.41  | 1.73  | 1.95  | 1.86  | 1.71 | 1.86 | 1.79 |
| CCNG1   | 1.24      | 0.87 | 0.93 | 0.80 | 1.05 | 1.20 | 0.82 | 1.08 | 1.13 | 2.59           | 2.87 | 2.63  | 2.48  | 2.53  | 2.84  | 2.20 | 2.44 | 2.33 |

| GENES   | miR-NC VEGF 1h |       |       |        |       |      |       |       |       | miR-133a-3P VEGF 1h |       |       |       |       |       |       |       |       |
|---------|----------------|-------|-------|--------|-------|------|-------|-------|-------|---------------------|-------|-------|-------|-------|-------|-------|-------|-------|
|         | 0.90           | 0.91  | 1.06  | 0.85   | 0.94  | 1.02 | 1.02  | 0.95  | 1.01  | 0.39                | 0.49  | 0.51  | 0.34  | 0.40  | 0.24  | 0.47  | 0.50  | 0.58  |
| PLAUR   | 0.90           | 0.91  | 1.06  | 0.85   | 0.94  | 1.02 | 1.02  | 0.95  | 1.01  | 0.39                | 0.49  | 0.51  | 0.34  | 0.40  | 0.24  | 0.47  | 0.50  | 0.58  |
| MSN     | 1.11           | 1.10  | 1.13  | 0.85   | 1.02  | 1.00 | 1.04  | 0.88  | 1.07  | 0.69                | 0.64  | 0.59  | 0.32  | 0.40  | 0.53  | 0.66  | 0.67  | 0.72  |
| RCAN1.4 | 14.95          | 6.75  | 18.70 | 13.23  | 10.52 | 9.45 | 13.19 | 12.79 | 16.98 | 76.10               | 68.17 | 58.90 | 63.43 | 78.58 | 69.36 | 62.67 | 80.67 | 51.54 |
| CD44    | 0.90           | 0.98  | 0.86  | 1.01   | 0.97  | 0.92 | 1.15  | 1.21  | 0.95  | 0.28                | 0.25  | 0.29  | 0.14  | 0.19  | 0.21  | 0.34  | 0.36  | 0.39  |
| ID1     | 0.76           | 0.45  | 0.42  | 0.87   | 0.94  | 1.25 | 0.56  | 0.50  | 0.48  | 0.40                | 0.25  | 0.53  | 0.29  | 0.30  | 0.43  | 0.45  | 0.46  | 0.39  |
| CCNE1   | 1.05           | 1.77  | 0.98  | 1.78   | 1.14  | 1.02 | 0.96  | 1.20  | 0.88  | 0.80                | 0.96  | 0.93  | 0.69  | 0.99  | 0.76  | 0.64  | 0.61  | 0.72  |
| CCND1   | 1.11           | 1.84  | 0.99  | nd     | 1.72  | 0.84 | 1.32  | 1.69  | 1.04  | 0.99                | 1.30  | 1.29  | 0.81  | 0.78  | 0.85  | 0.62  | 0.70  | 0.85  |
| DLL4    | 1.76           | 1.95  | 1.96  | 1.30   | 2.69  | 1.74 | 2.45  | 3.58  | 2.40  | 14.57               | 17.91 | 15.95 | 11.73 | 21.50 | 21.22 | 14.39 | 14.08 | 16.60 |
| HEY1    | 4.31           | 6.20  | 4.73  | 3.28   | 9.32  | 2.07 | 4.11  | 10.89 | 3.21  | 19.52               | 21.93 | 15.03 | 13.20 | 11.10 | 12.63 | 17.99 | 14.11 | 16.80 |
| JAG2    | 1.01           | 1.76  | 0.91  | 1.12   | 1.96  | 0.87 | 0.96  | 1.66  | 1.30  | 3.48                | 3.23  | 3.36  | 3.58  | 3.02  | 4.18  | 2.72  | 2.48  | 2.69  |
| NOTCH4  | 1.43           | 1.36  | 0.70  | 1.22   | 2.41  | 1.01 | 0.81  | 1.30  | 0.89  | 2.59                | 3.12  | 2.79  | 4.34  | 4.94  | 4.19  | 2.69  | 2.89  | 2.92  |
| NRARP   | 1.17           | 2.25  | 1.18  | 1.60   | 3.31  | 1.30 | 2.35  | 3.39  | 2.73  | 4.40                | 4.58  | 4.80  | 4.85  | 5.02  | 6.68  | 5.03  | 4.47  | 5.59  |
| HES4    | 0.91           | 1.62  | 0.88  | 1.19   | 2.18  | 0.91 | 1.18  | 1.85  | 0.84  | 4.97                | 4.03  | 4.60  | 4.18  | 4.57  | 5.60  | 4.48  | 3.77  | 4.18  |
| TIMP3   | 0.702          | 0.576 | 0.733 | 0.7719 | 0.63  | 0.65 | 1.164 | 0.614 | 1.225 | 6.51                | 5.79  | 6.77  | 5.44  | 5.18  | 5.79  | 5.01  | 5.06  | 5.95  |
| ADAMTS1 | 3.37           | 3.05  | 5.27  | nd     | nd    | nd   | 3.06  | 3.15  | 3.24  | 9.64                | 8.71  | 8.31  | nd    | nd    | nd    | 6.14  | 4.75  | 5.91  |
| ITGa6   | 0.83           | 0.90  | 0.90  | 0.87   | 0.82  | 0.71 | 0.95  | 0.87  | 1.09  | 1.26                | 1.50  | 1.59  | 2.16  | 1.67  | 1.61  | 1.50  | 0.92  | 1.50  |
| THBS1   | 1.18           | 1.17  | 1.17  | 0.97   | 1.01  | 0.94 | 1.28  | 1.34  | 1.27  | 2.25                | 1.87  | 2.17  | 1.53  | 1.93  | 2.66  | 1.89  | 2.12  | 2.15  |
| SPARC   | 1.15           | 1.00  | 1.07  | 0.88   | 1.41  | 0.65 | 1.09  | 1.57  | 1.35  | 2.21                | 2.18  | 2.4   | 2.08  | 1.78  | 2.27  | 2.24  | 2.56  | 2.21  |
| CDK1    | 1.06           | 1.93  | 1.04  | 1.20   | 1.55  | 0.64 | 1.13  | 2.15  | 0.96  | 0.25                | 0.23  | 0.30  | 0.17  | 0.16  | 0.20  | 0.22  | 0.25  | 0.28  |
| CCNA2   | 1.12           | 1.98  | 1.09  | 1.73   | 1.08  | 1.09 | 0.74  | 1.34  | 0.65  | 0.20                | 0.23  | 0.27  | 0.13  | 0.18  | 0.13  | 0.12  | 0.11  | 0.15  |
| CCNB1   | 1.15           | 2.05  | 0.93  | 1.04   | 1.59  | 1.01 | 1.11  | 1.44  | 0.82  | 0.29                | 0.25  | 0.32  | 0.18  | 0.14  | 0.19  | 0.19  | 0.17  | 0.26  |
| MCM2    | 1.01           | 1.49  | 0.99  | 1.05   | 1.46  | 0.78 | 1.14  | 1.89  | 1.16  | 0.36                | 0.37  | 0.44  | 0.49  | 0.43  | 0.50  | 0.36  | 0.39  | 0.47  |
| MCM4    | 1.21           | 1.83  | 0.92  | 1.03   | 1.69  | 0.91 | 0.88  | 1.18  | 0.76  | 0.50                | 0.48  | 0.30  | 0.37  | 0.33  | 0.40  | 0.29  | 0.25  | 0.35  |
| CCND3   | 0.73           | 1.15  | 0.64  | 1.24   | 1.98  | 1.05 | 0.69  | 1.01  | 0.55  | 1.00                | 1.03  | 1.09  | 1.73  | 1.76  | 2.02  | 0.86  | 0.85  | 0.90  |
| CCNG1   | 1.23           | 1.98  | 1.07  | 0.99   | 1.58  | 0.97 | 0.74  | 1.38  | 0.87  | 2.49                | 2.51  | 2.62  | 1.71  | 2.31  | 2.10  | 1.89  | 1.60  | 1.81  |

**Supplementary Table S4. Differential gene expression of angiogenic-related genes in HUVEC expressing miR-133a-3p or miR-NC.** HUVEC transfected with miR-133a-3p (blue columns) or negative control miR-NC (grey columns) were left unstimulated (0h) or were stimulated with VEGF-A165 for 1 hour. Rows show fold-induction RNA levels for each gene referred to miR-NC 0h. Ct values were normalised using the Ct values for the housekeeping gene *Hprt-1*. Analysis of data was carried out using the comparative  $2^{-\Delta\Delta Ct}$  method. nd = non-determined.

| Genes                | miR-133a-3p | miR-133a-3p | miR-133a-3p | miR-133a-5p | miR-133a-5p | miR-133a-5p |
|----------------------|-------------|-------------|-------------|-------------|-------------|-------------|
|                      | miRWalk     | TargetScan  | miRDB       | miRWalk     | TargetScan  | miRDB       |
| <i>VEGF-A</i>        | YES/5UTR    | NO          | NO          | NO          | NO          | NO          |
| <i>VEGF-B</i>        | NO          | NO          | NO          | YES         | YES         | NO          |
| <i>VEGF-C</i>        | NO          | NO          | NO          | NO          | NO          | NO          |
| <i>VEGFR1</i>        | NO          | NO          | NO          | NO          | NO          | NO          |
| <i>VEGFR2</i>        | NO          | NO          | NO          | NO          | NO          | NO          |
| <i>VEGFR3</i>        | NO          | NO          | NO          | NO          | NO          | NO          |
| <i>CALCINEURIN-A</i> | YES         | NO          | NO          | NO          | NO          | NO          |
| <i>CALCINEURIN-B</i> | YES         | NO          | NO          | NO          | NO          | NO          |
| <i>NFAT1</i>         | NO          | NO          | NO          | NO          | NO          | NO          |
| <i>NFAT2</i>         | NO          | NO          | NO          | NO          | NO          | NO          |
| <i>NFAT3</i>         | YES         | NO          | NO          | YES         | NO          | NO          |
| <i>NFAT4</i>         | YES         | NO          | NO          | NO          | NO          | NO          |
| <i>NFAT5</i>         | YES         | YES         | YES         | YES         | YES         | YES         |
| <i>JNK</i>           | NO          | NO          | NO          | YES         | NO          | NO          |
| <i>p38</i>           | NO          | NO          | NO          | NO          | NO          | NO          |
| <i>ERK</i>           | NO          | NO          | NO          | NO          | NO          | NO          |

**Supplementary Table S5. Bioinformatic analysis of miR-133a predicted binding sites in candidate genes encoding well-known mediators of VEGF-induced angiogenesis.**

The sequences of the indicated genes were analysed for potential binding sites for miR-133a-3p, or miR-133a-5p using miRWalk, Targetscan, and miRDB data bases.

| Genes          | miR-133a-3p<br>miRWalk | miR-133a-3p<br>TargetScan | miR-133a-3p<br>miRDB | miR-133a-5p<br>miRWalk | miR-133a-5p<br>TargetScan | miR-133a-5p<br>miRDB |
|----------------|------------------------|---------------------------|----------------------|------------------------|---------------------------|----------------------|
| <i>PLAUR</i>   | YES                    | NO                        | NO                   | NO                     | NO                        | NO                   |
| <i>MSN</i>     | NO                     | YES                       | YES                  | NO                     | NO                        | NO                   |
| <i>RCAN1.4</i> | YES                    | NO                        | NO                   | YES                    | YES                       | NO                   |
| <i>CD44</i>    | YES                    | NO                        | NO                   | YES                    | YES                       | NO                   |
| <i>ID1</i>     | NO                     | NO                        | NO                   | NO                     | NO                        | NO                   |
| <i>CCNE1</i>   | YES                    | NO                        | NO                   | YES                    | NO                        | NO                   |
| <i>CCND1</i>   | YES                    | NO                        | NO                   | NO                     | NO                        | NO                   |
| <i>DLL4</i>    | YES                    | NO                        | NO                   | YES                    | NO                        | NO                   |
| <i>HEY1</i>    | YES                    | NO                        | NO                   | YES                    | YES                       | NO                   |
| <i>JAG2</i>    | YES                    | NO                        | NO                   | YES                    | NO                        | NO                   |
| <i>NOTCH4</i>  | YES                    | NO                        | NO                   | YES                    | NO                        | NO                   |
| <i>NRARP</i>   | NO                     | NO                        | NO                   | NO                     | NO                        | NO                   |
| <i>HES4</i>    | YES                    | NO                        | NO                   | NO                     | YES                       | NO                   |
| <i>TIMP3</i>   | YES                    | NO                        | NO                   | YES                    | NO                        | NO                   |
| <i>ADAMTS1</i> | YES                    | NO                        | NO                   | YES                    | YES                       | NO                   |
| <i>ITGA6</i>   | NO                     | NO                        | NO                   | YES                    | NO                        | NO                   |
| <i>THBS1</i>   | YES                    | NO                        | NO                   | YES                    | NO                        | NO                   |
| <i>SPARC</i>   | YES                    | NO                        | NO                   | NO                     | NO                        | NO                   |
| <i>CDK1</i>    | NO                     | NO                        | NO                   | NO                     | YES                       | NO                   |
| <i>CCNA2</i>   | NO                     | NO                        | NO                   | NO                     | NO                        | NO                   |
| <i>CCNB1</i>   | YES                    | NO                        | NO                   | NO                     | NO                        | NO                   |
| <i>MCM2</i>    | NO                     | NO                        | NO                   | YES                    | NO                        | NO                   |
| <i>MCM4</i>    | NO                     | NO                        | NO                   | NO                     | NO                        | NO                   |
| <i>CCND3</i>   | YES                    | NO                        | NO                   | NO                     | YES                       | YES                  |
| <i>CCNG1</i>   | NO                     | NO                        | NO                   | NO                     | NO                        | NO                   |

**Supplementary Table S6. Bioinformatic analysis of miR-133a predicted binding sites in the differentially expressed group of genes described in this study.** The sequences of the indicated genes were analysed for potential binding sites for miR-133a-3p, or miR-133a-5p using miRWalk, Targetscan, and miRDB data bases. None of the genes was predicted to contain miR-133a binding sites by all the data bases used.

| <b>Genes</b>   | <b>Taqman Assay ID</b> |
|----------------|------------------------|
| <i>MSN</i>     | Hs00741306_mH          |
| <i>PLAUR</i>   | Hs00958880_m1          |
| <i>CD44</i>    | Hs01075864_m1          |
| <i>ID1</i>     | Hs03676575_s1          |
| <i>CCNE1</i>   | Hs01026536_m1          |
| <i>CCND1</i>   | Hs00765553_m1          |
| <i>DLL4</i>    | Hs00184092_m1          |
| <i>HEY1</i>    | Hs05047713_s1          |
| <i>JAG2</i>    | Hs00171432_m1          |
| <i>NOTCH4</i>  | Hs00965889_m1          |
| <i>NRARP</i>   | Hs04183811_s1          |
| <i>HES4</i>    | Hs00368353_g1          |
| <i>TIMP3</i>   | Hs00165949_m1          |
| <i>ITGA6</i>   | Hs01041011_m1          |
| <i>ADAMTS1</i> | Hs00199608_m1          |
| <i>THBS1</i>   | Hs00962908_m1          |
| <i>SPARC</i>   | Hs00234160_m1          |
| <i>CDK1</i>    | Hs00938777_m1          |
| <i>CCNA2</i>   | Hs00996788_m1          |
| <i>CCNB1</i>   | Hs01030099_m1          |
| <i>MCM2</i>    | Hs01091564_m1          |
| <i>MCM4</i>    | Hs00907398_m1          |
| <i>CCND3</i>   | Hs01017690_g1          |
| <i>CCNG1</i>   | Hs00171112_m1          |
| <i>RCAN1.4</i> | Hs01120957_m1          |
| <i>HPRT1</i>   | Hs99999909_m1          |

Supplementary Table S7. References of TaqMan Gene Expression Assays (Applied Biosystems) used in this work.
